# Supplementary material for: DMSO Efficiently Down Regulates Pluripotency Genes in Human Embryonic Stem Cells during Definitive Endoderm Derivation and Increases the Proficiency of Hepatic Differentiation
Source: PubMed Central journal article supplement (PMC4320104; doi:10.1371/journal.pone.0117689), 2015-02-06
Supplement: pone.0117689.s004.pdf [file pone.0117689.s004.pdf]

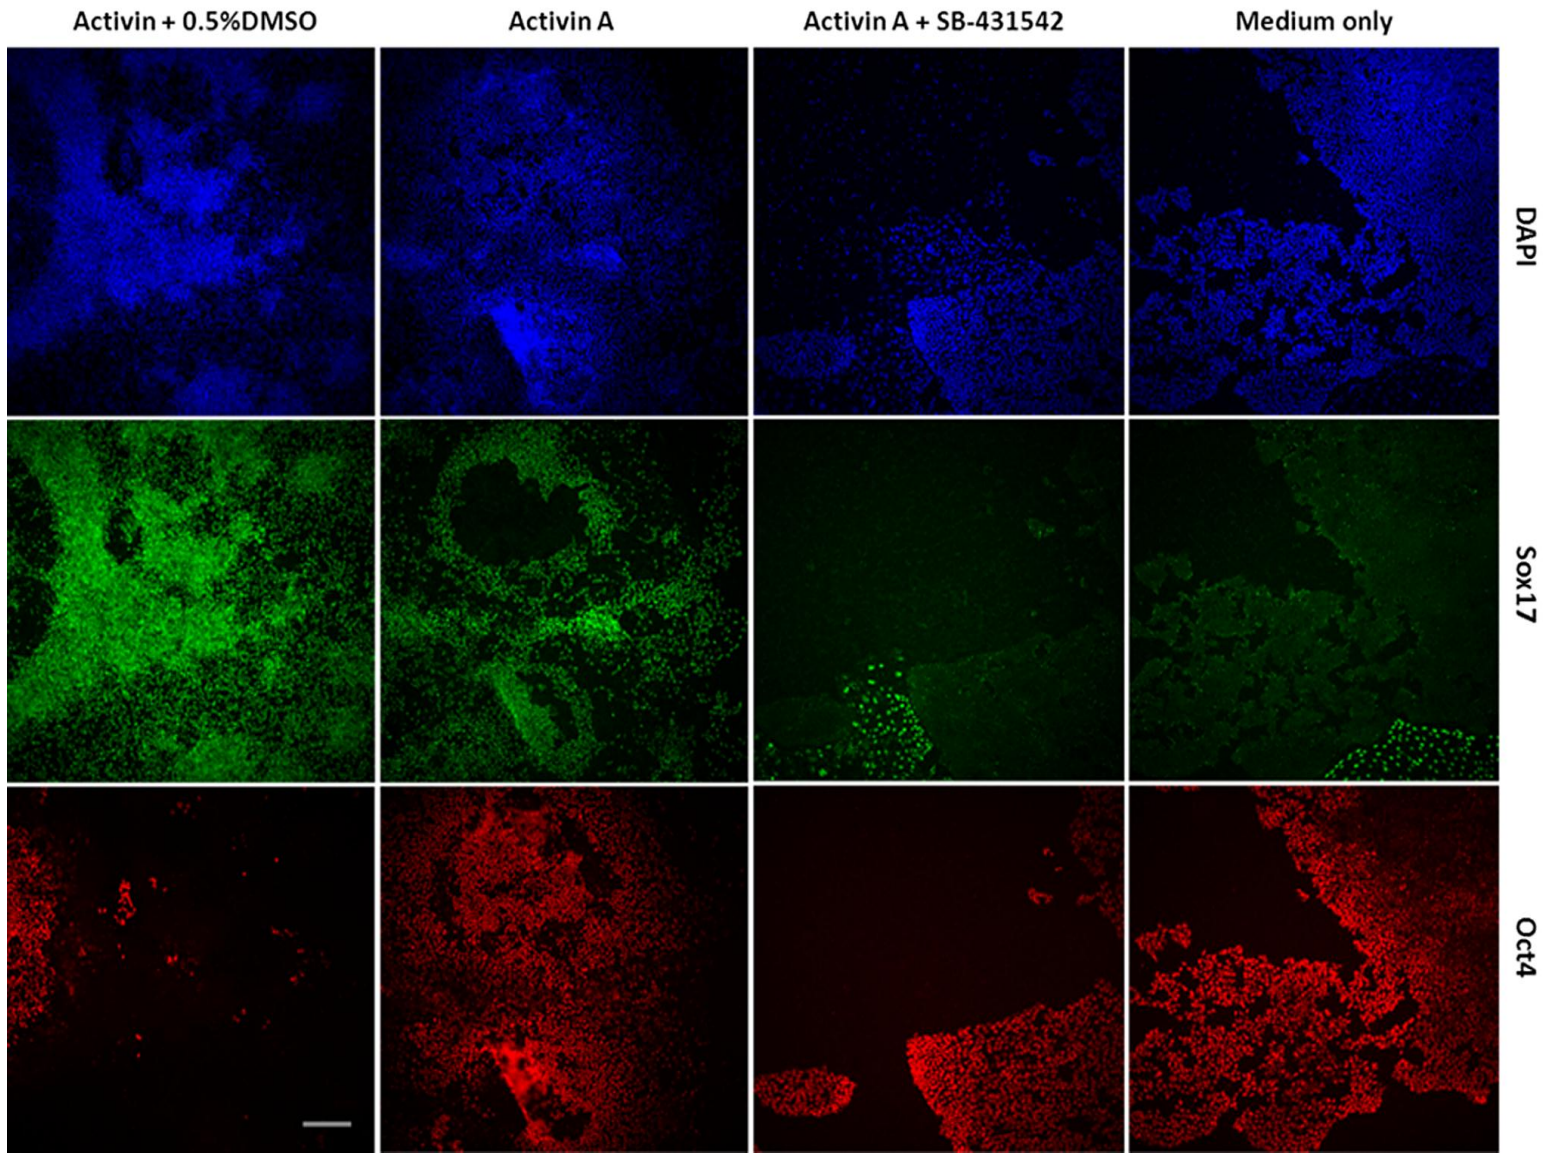

**S4 Figure: Immunofluorescence staining of OCT4 and OX17 at day 4 of DE specification.**

Addition of 30 $\mu$ M of the TGF $\beta$  signalling inhibitor SB-431542 to the Activin A-driven differentiation abolished the ability of Activin A to induce cells to express SOX17. 'Medium only' represents culture condition deprived of differentiating signals to monitor spontaneous differentiation. Activin A and ActivinA+0.5%DMSO were used as positive controls for DE specification. DAPI was used to stain nuclei. Scale bar 100 $\mu$ m.
