# Supplementary material for: DMSO Efficiently Down Regulates Pluripotency Genes in Human Embryonic Stem Cells during Definitive Endoderm Derivation and Increases the Proficiency of Hepatic Differentiation
Source: PubMed Central journal article supplement (PMC4320104; doi:10.1371/journal.pone.0117689), 2015-02-06
Supplement: pone.0117689.s006.pdf [file pone.0117689.s006.pdf]

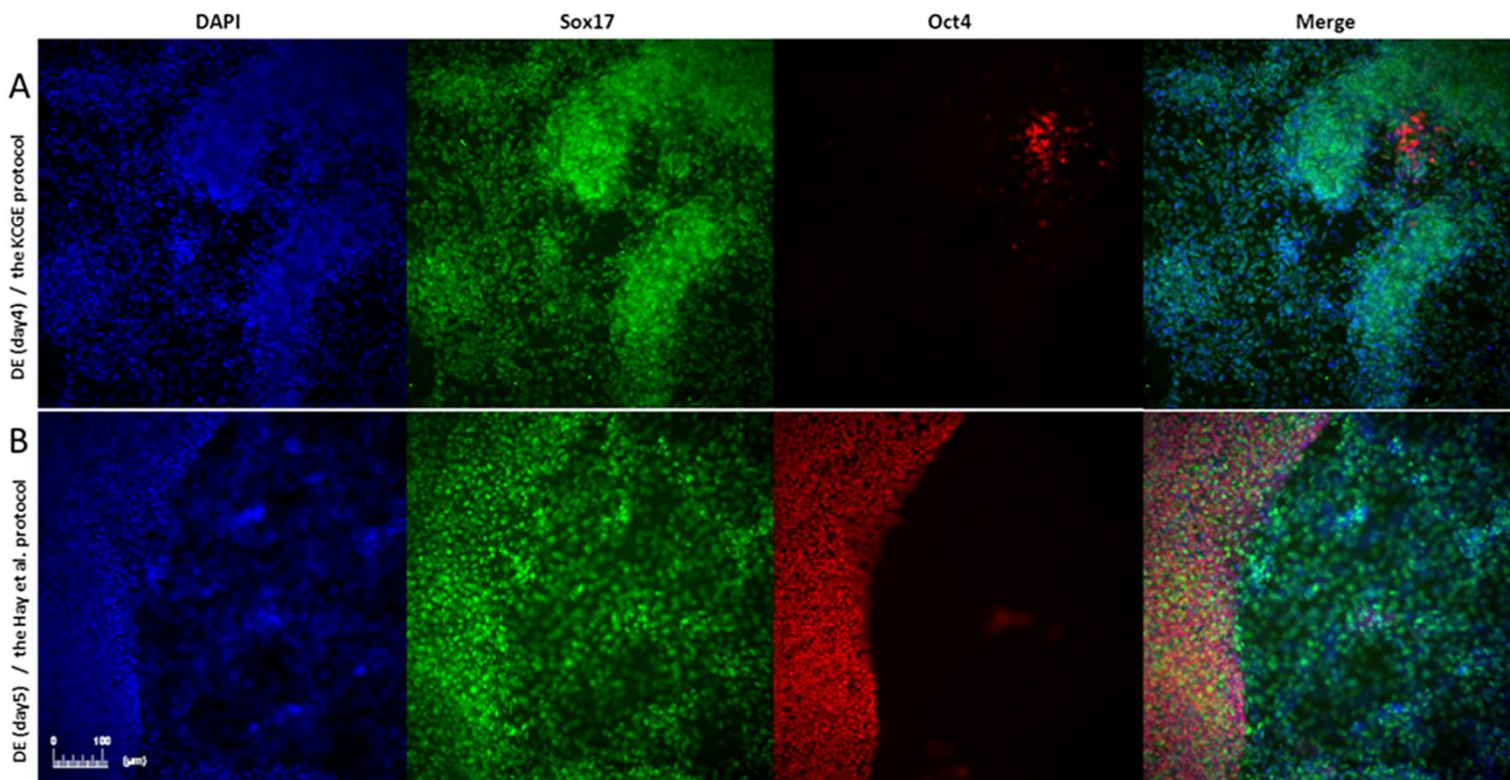

**S6 Figure: Immunofluorescence staining of DE for OCT4 and SOX17.**

hESC were differentiated to DE via the KCGE protocol (A) and the Hay et al. protocol (2008). (B). Scale bar 100 μm.
